# Supplementary material for: Gene Regulatory Network of Human GM-CSF-Secreting T Helper Cells
Source: J Immunol Res. 2021 Jul 3;2021:8880585. doi: 10.1155/2021/8880585 (PMC8275380; doi:10.1155/2021/8880585)
Supplement: Supplementary Materials — contain the following Figures and Tables: Supplementary Table S1A: disease enrichment analysis based on the gene list ranked by gene expression in GM-CSF-positive CD4 T cells (versus GM-CSF-negative CD4 T cells). Supplementary Table S1B: disease enrichment analysis based on the gene list ranked by gene expression in memory (versus naïve) CD4 T cells. Supplementary Table S2A: KEGG pathway enrichment analysis of genes assigned to consensus peaks. Supplementary Table S2B: GWAS catalog disease enrichment analysis of genes assigned to consensus peaks. Supplementary Figure S1: purity of cell populations used in this study. Supplementary Figure S2: expression profile and DNA accessibility signatures of human memory CD4 T cells. Supplementary Figure S3: comparison of published and novel naïve and memory T cell transcriptome data. Supplementary Figure S4: cytokine coexpression in GM-CSF-producing T cells. Supplementary Figure S5: enrichment of footprints across peaks ranked based on differential accessibility. Supplementary Figure S6: network structure identifying shared TF binders across peaks and shared targets of key TFs. [file 8880585.f1.zip]

Archive with 5 entries (5 files):
- Elias_et_al_Supplementary_Figures (1).pdf
- Elias_et_al_Supplementary_Table_1A.xlsx.txt
- Elias_et_al_Supplementary_Table_1B.xlsx.txt
- Elias_et_al_Supplementary_Table_2A.xlsx.txt
- Elias_et_al_Supplementary_Table_2B.xlsx.txt
